# Supplementary material for: The Cytotoxicity of Tungsten Ions Derived from Nanoparticles Correlates with Pulmonary Toxicity
Source: MDPI journal article supplement (doi:10.3390/toxics11060528), 2023-06-13
Supplement: s1 [file s1]

## Supplementary Material

For

### **The Release of Tungsten Ions Derived from Tungsten Carbide Nanoparticles Contributes to Cytotoxicity**

*Jun Yao<sup>a</sup>, Pengfei Zhou<sup>a</sup>, Xin Zhang<sup>a</sup>, Beilei Yuan<sup>a,b,\*</sup>, Yong Pan<sup>a,b,\*</sup>, Juncheng Jiang<sup>b,c,\*</sup>*

<sup>a</sup> College of Safety Science and Engineering, Nanjing Tech University, Nanjing 211816, Jiangsu, P. R. China

<sup>b</sup> Jiangsu Key Laboratory of Hazardous Chemicals Safety and Control, Nanjing Tech University, Nanjing 211816, Jiangsu, P. R. China

<sup>c</sup> School of Environment & Safety Engineering, Changzhou University, Changzhou 213164, Jiangsu, P. R. China

\* Corresponding author. Tel.: +86-25- 83239976;

E-mail: yuanbeilei@163.com (B.L. Yuan); yongpan@njtech.edu.cn (Y. Pan);

jcjiang\_njtech@163.com (J.C. Jiang)

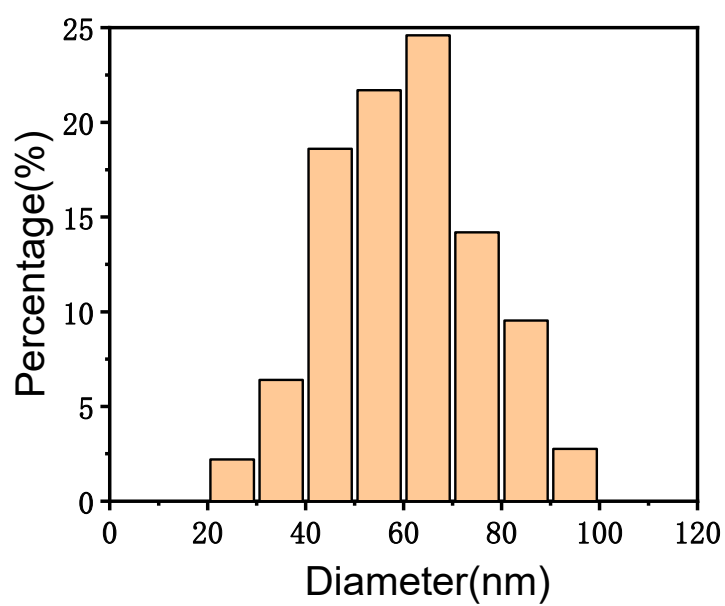

**Fig. S1.** Diameter distribution of nano-WC suspension.

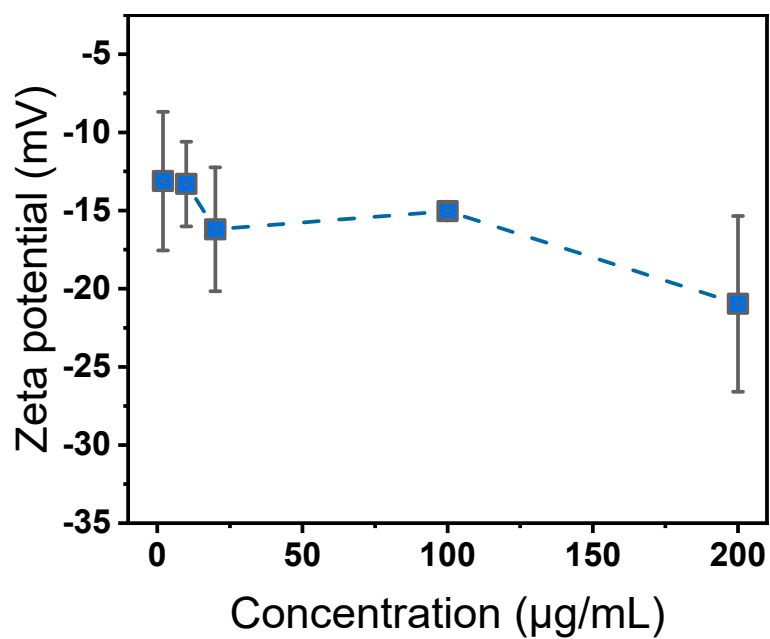

**Fig. S2.** The distribution of zeta potential as a function of nano-WC concentration.
